# Supplementary material for: Reexamining microRNA Site Accessibility in Drosophila: A Population Genomics Study
Source: PubMed Central journal article supplement (PMC2682560; doi:10.1371/journal.pone.0005681), 2009-05-25
Supplement: pone.0005681.s002.pdf [file pone.0005681.s002.pdf]

## Insertions

In the 5<sup>th</sup> column, numbers in brackets are quality scores.

|          |          |                               |        |                              |
|----------|----------|-------------------------------|--------|------------------------------|
| mir-280  | 3809949  | md106=>"a"                    | Mature | Dubious: run of As (32)      |
|          | 3809934  | md106=>"t"                    | Mature | Dubious: run of Ts (19)      |
| mir-313  | 16099094 | md199=>"t"                    | Loop   | Dubious: run of Ts (57)      |
| mir-2a-2 | 19565434 | md106=>"t"                    | Mature | Dubious: run of Ts (16)      |
| mir-286  | 15176346 | sim4+6"=>"c"                  | Loop   |                              |
|          |          | c1674=>"c"                    | Loop   |                              |
|          |          | w501+f"=>"c"                  | Loop   |                              |
|          |          | md199=>"c"                    | Loop   |                              |
|          |          | md106=>"c"                    | Loop   | G insertion; quality ok (90) |
| mir-1003 | 20484338 | newc=>"g"                     | Star   |                              |
| mir-1010 | 18118635 | md199=>"att"                  | Loop   |                              |
|          |          | sim4+6=>"att"                 | Loop   |                              |
|          |          | md106=>"att"                  | Loop   |                              |
|          |          | w501+f"=>"att"                | Loop   |                              |
| mir-990  | 12410154 | md199=>c                      | Mature |                              |
| mir-989  | 9661342  | md106=>c                      | Loop   |                              |
| mir-964  | 5642103  | c1674=>tgtggttatg<br>ataaatca | Flank  |                              |
|          | 5642103  | md199=>cgtggttat<br>gataagtca | Flank  |                              |
|          | 5642103  | sim4+6=>tgtggt                | Flank  |                              |
|          |          | w501=>tgtggt                  | Flank  |                              |
|          | 5642105  | c1674=>c                      | Flank  |                              |
|          |          | md199=>c                      | Flank  |                              |
|          | 5642109  | sim4+6=>agtcaatc<br>aaaa      | Flank  |                              |
|          |          | w501+f=>agtcaat<br>caaaa      | Flank  |                              |

|         |          |                 |        |  |
|---------|----------|-----------------|--------|--|
| mir-966 | 6045680  | w501+f=>aatgtcg | Mature |  |
| mir-967 | 12460020 | sim4+6=>ct      | Star   |  |
|         | 12460009 | w501+f=>actctc  | Flank  |  |

## Deletions

|          |                         |                                                 |                   |             |
|----------|-------------------------|-------------------------------------------------|-------------------|-------------|
| mir-303  | 4211476                 | sim4+6, w501+f,<br>c1674                        | Mature 4          |             |
| mir-276b | 10293784 ..<br>10293785 | md106, sim4+6,<br>newc, w501+f,<br>md199, c1674 | Loop              | fixed?      |
|          | 10293735                | md106, sim4+6,<br>newc, w501+f,<br>md199, c1674 | Flank             | fixed?      |
| mir-5    | 15176057                | md106, sim4+6,<br>w501+f, md199,<br>c1674       | Loop              | polymorphic |
| mir-9b   | 16694722 ..<br>16694723 | c1674                                           | Loop 3'           | polymorphic |
|          | 16694714 ..<br>16694715 | md199                                           | Loop 5'           | polymorphic |
| mir-133  | 20604269                | md106                                           | Mature 20         | polymorphic |
| mir-288  | 20605992                | md106                                           | Loop / end mature | polymorphic |
| mir-1012 | 22687100                | sim4+6, md199,<br>w501+f, c1674                 | Loop              | polymorphic |
| mir-1005 | 4343724                 | md106, sim4+6,<br>w501+f, c1674                 | Loop              | polymorphic |
| mir-986  | 3956805                 | newc                                            | Lower             | polymorphic |
| mir-961  | 5641273                 | c1674, md106,<br>sim4+6, w501+f                 | Lower             | fixed?      |
| mir-972  | 19385103                | c1674, md106,<br>md199, sim4+6,<br>w501+f       | Lower             | fixed?      |
| mir-973  | 19385466 ..<br>19385468 | md106, md199,<br>sim4+6, w501+f                 | Lower             | fixed?      |

|  |          |                                 |      |        |
|--|----------|---------------------------------|------|--------|
|  | 19385525 | md106, md199,<br>sim4+6, w501+f | Loop | fixed? |
|--|----------|---------------------------------|------|--------|
